# Supplementary material
Source: PubMed Central journal article supplement (PMC4071301)
Supplement: NIHMS599048-supplement-01.pdf [file NIHMS599048-supplement-01.pdf]

## Supplemental information to accompany

### “Aromatic organosulfates in atmospheric aerosols: synthesis, characterization, and abundance”

Sean Staudt<sup>1</sup>, Shuvashish Kundu<sup>1</sup>, Hans-Joachim Lehmler<sup>2</sup>, Xianran He<sup>2</sup>, Tianqu Cui,<sup>3</sup> Ying-Hsuan Lin,<sup>3</sup> Kasper Kristensen,<sup>4</sup> Marianne Glasius,<sup>4</sup> Xiaolu Zhang,<sup>5,#</sup> Rodney J. Weber,<sup>5</sup> Jason D. Surratt<sup>3</sup>, Elizabeth A. Stone<sup>1,\*</sup>

<sup>1</sup>Department of Chemistry, University of Iowa, Iowa City, IA 52242, United States

<sup>2</sup>Department of Occupational and Environmental Health, College of Public Health, University of Iowa, Iowa City, IA 52242, USA

<sup>3</sup>Department of Environmental Sciences and Engineering, Gillings School of Global Public Health, University of North Carolina at Chapel Hill, Chapel Hill, NC 27599, USA

<sup>4</sup>Department of Chemistry and iNANO, Aarhus University, 8000 Aarhus C, Denmark

<sup>5</sup>School of Earth and Atmospheric Sciences, Georgia Institute of Technology, Atlanta, GA 30332, USA

<sup>#</sup>Present address: Department of Civil and Environmental Engineering, University of California, Davis, CA 95616, USA

\*Corresponding author phone: +1-319-384-1863, fax: +1-319-335-1270;

email: [betsy-stone@uiowa.edu](mailto:betsy-stone@uiowa.edu)
